# Supplementary material for: Carbon nitride based Schottky junction with a Ni–Mo synergistic interaction for highly efficient photocatalytic hydrogen production
Source: Royal Society of Chemistry journal article supplement (doi:10.1039/d2cy00792d), 2022-01-01
Supplement: d2cy00792d1.pdf [file d2cy00792d1.pdf]

**Carbon nitride based Schottky junction with Ni-Mo synergistic interaction for high efficient photocatalytic hydrogen production**

Lei Ding,<sup>a</sup> Li-Jing Wang,<sup>b</sup> Ru-Yi Liu,<sup>a</sup> Yan-Fei Li,<sup>a</sup> Hai-Zhu Sun<sup>\*a</sup>

<sup>a</sup> National & Local United Engineering Laboratory for Power Batteries, College of Chemistry, Northeast Normal University, Changchun 130024, People's Republic of China.

<sup>b</sup> Henan Engineering Center of New Energy Battery Materials, Henan D&A Engineering Center of Advanced Battery Materials, College of Chemistry and Chemical Engineering, Shangqiu Normal University, Shangqiu 476000, People's Republic of China.

\* Corresponding authors. E-mail: sunhz335@nenu.edu.cn

## 1. Materials

Analytically pure urea,  $\text{Na}_2\text{MoO}_4 \cdot 2\text{H}_2\text{O}$ ,  $\text{Ni}(\text{NO}_3)_2 \cdot 6\text{H}_2\text{O}$  and  $\text{NaH}_2\text{PO}_2 \cdot 2\text{H}_2\text{O}$  were purchased from Aladdin company, China and used without further purification. Throughout the experiment, distilled water was provided by a Water Purifier Nanopure system.

## 2. Characterization

The structure of CN, CN/xNiMoP<sub>2</sub> were investigated by power X-ray diffraction (XRD) measurement on a Rigaku SmartLab X-ray diffractometer. The morphology of the catalysts was measured by field emission scanning electron microscopy (XL 30 ESEM-FEG) and transmission electron microscopy (TEM, JEM-2010F). A Nicolet AVATAR 360 FT-IR spectrophotometer was operated to achieve the Fourier transform infrared (FT-IR) spectrum. The UV-Vis diffuse reflectance spectra (DRS) were obtained by a UV-Vis spectrophotometer of Shimadzu 3600 UV-Vis-NIR spectrophotometer (Cary 7000). Nitrogen adsorption-desorption isotherms and BET test were performed by using ASAP 2020M. The fluorescence spectra (PL) and time-resolved photoluminescence (TRPL) decay spectra were obtained by Edinburgh FLS920P. The X-ray photoelectron spectra (XPS) were conducted on a VG ESCALAB MKII spectrometer, employing Mg K excitation (1253.6 eV). Electron paramagnetic resonance (EPR) experiments were conducted at room temperature on an ER-200D spectrometer (Bruker, Germany). Thermogravimetric analysis (TGA) measurements were conducted using NETZSCH STA499F3 (air flow) with mass spectroscopy (MS, QMS403D).

### 3. Electrochemical test analysis

The photocurrent density and electrochemical impedance spectra (EIS) were acquired on a CHI 660E system (Shanghai Chenhua Instrument Co., Ltd, Shanghai, China) in a three-electrode system. The FTO/catalysts were used as the working electrode, a saturated Ag/AgCl electrode was used as the reference electrode, and a Pt sheet was used as the counter electrode. The working electrodes were prepared as follows: Typically, 35 mg of photocatalyst powder, 100 mg ethyl cellulose and 2 mL ethanol were mixed in an agate mortar and thoroughly ground for 60 min. Then, 0.5 mL of the solution was homogeneously spread on a FTO (1 cm×3 cm) glass substrate. After coating, the FTO glasses were calcined at 350 °C for 2 h under air atmosphere. 0.5 M Na<sub>2</sub>SO<sub>4</sub> was used as electrolyte at normal temperature, the light source was a 300 W Xe lamp with a UV cutoff filter (420 nm).

### 4. Apparent quantum efficiency (AQE) calculations

The measurement of apparent quantum efficiency (AQE) was carried out under the Xe lamp (300 W) equipped with different band-pass filters (420 nm). The intensity of irradiated light was recorded from a spectroradiometer (CEL-FZ-A, China).

The apparent quantum efficiency (AQE) was calculated by the Equation 1:

$$\text{AQE}(\%) = \frac{2 \times \text{number of evolved H}_2 \text{ molecules}}{\text{number of incident photons}} \times 100\% \quad (1)$$

$$= \frac{2nNAhc}{PS\lambda t} \times 100\%$$

where  $n$  is the evolution amount of H<sub>2</sub>,  $N_A$  is Avogadro's constant,  $h$  is Planck's constant,  $c$  is the speed of light,  $\lambda$  is the wavelength of the incident light,  $P$  is the power density,  $S$  is the light exposure area, and  $t$  is the reaction time.

Table S1. Calculated apparent quantum efficiency (AQE) at different wavelengths.

| Wavelength                 | H <sub>2</sub> Evolved<br>( $\mu\text{mol}$ ) | Light<br>Intensity | AQE   |
|----------------------------|-----------------------------------------------|--------------------|-------|
| $\lambda = 380 \text{ nm}$ | 4.82                                          | 6.07 mW            | 17.7% |
| $\lambda = 400 \text{ nm}$ | 4.29                                          | 8.17 mW            | 11.1% |
| $\lambda = 420 \text{ nm}$ | 2.61                                          | 13.51 mW           | 3.9%  |
| $\lambda = 450 \text{ nm}$ | 1.55                                          | 9.77 mW            | 3.0%  |
| $\lambda = 500 \text{ nm}$ | 0.20                                          | 9.83 mW            | 0.35% |

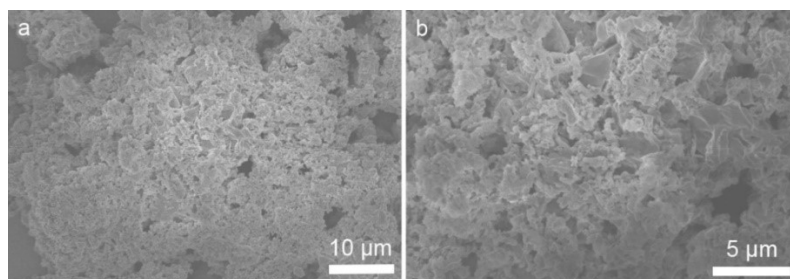

Fig. S1 SEM images of CN.

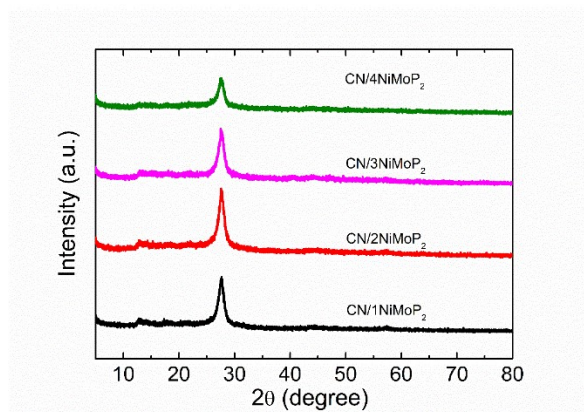

Fig. S2 XRD patterns of CN/xNiMoP<sub>2</sub>.

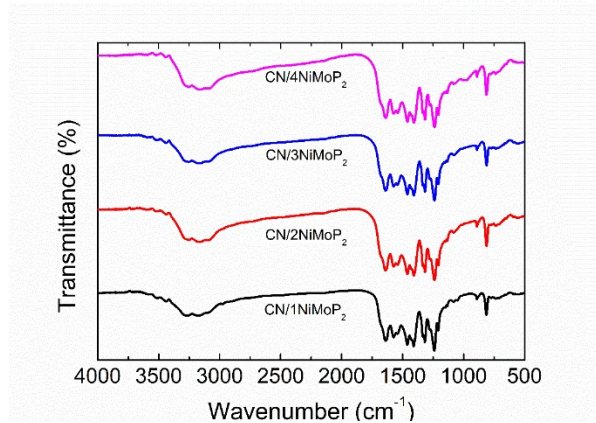

**Fig. S3** FTIR spectra of CN/xNiMoP<sub>2</sub>.

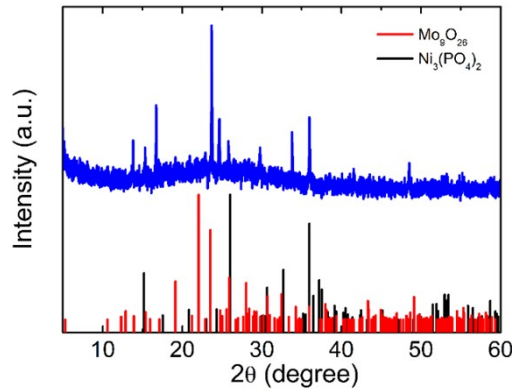

**Fig. S4** XRD pattern of the residue of CN/3NiMoP<sub>2</sub> composite after TGA measurement.

According to the **Fig. 3c** and **Fig. S4**,

$$m_{(\text{Mo}_9\text{O}_{26})} + m_{(\text{Ni}_3(\text{PO}_4)_2)} = 24.6\% * m_{(\text{CN}/3\text{NiMoP}_2)} \quad (2)$$

$$n * M_{(\text{Mo}_9\text{O}_{26})} + 3n * M_{(\text{Ni}_3(\text{PO}_4)_2)} = 24.6\% * m_{(\text{CN}/3\text{NiMoP}_2)} \quad (3)$$

here,  $m$  is the mass of sample.  $M$  is the relative molecular mass of sample.  $n$  is the amount of substance of  $\text{Mo}_9\text{O}_{26}$ . Since the elements Ni and Mo have the same amount of substance, the amount of substance of  $\text{Ni}_3(\text{PO}_4)_2$  is  $3n$ .

For  $\text{NiMoP}_2$ , the amount of substance is  $9n$ . Therefore, the loading mass percentage of  $\text{NiMoP}_2$  in  $\text{CN}/3\text{NiMoP}_2$  was obtained by the following equation.

$$\omega\% = 9n * M_{(\text{NiMoP}_2)} / m_{(\text{CN}/3\text{NiMoP}_2)} * 100\% \quad (4)$$

Accordingly,  $\text{NiMoP}_2$  in  $\text{CN}/3\text{NiMoP}_2$  is about 19.5%.

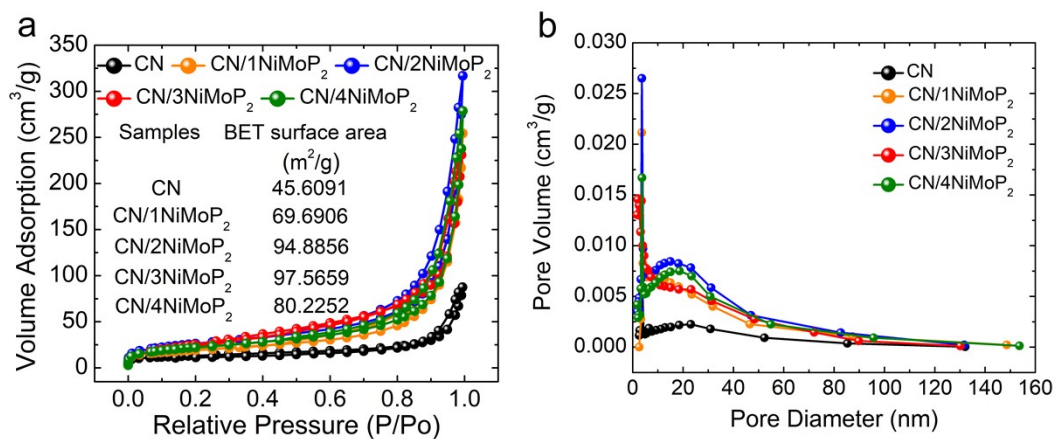

**Fig. S5** (a) Nitrogen adsorption-desorption; (b) Pore size distribution profiles of CN and CN/xNiMoP<sub>2</sub>.

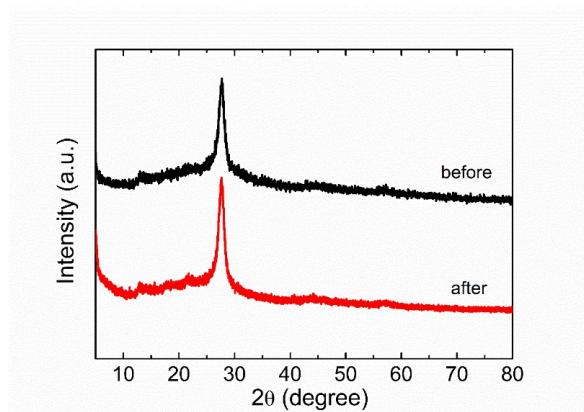

**Fig. S6** XRD of CN/3NiMoP<sub>2</sub> before and after cycling tests for H<sub>2</sub> production.

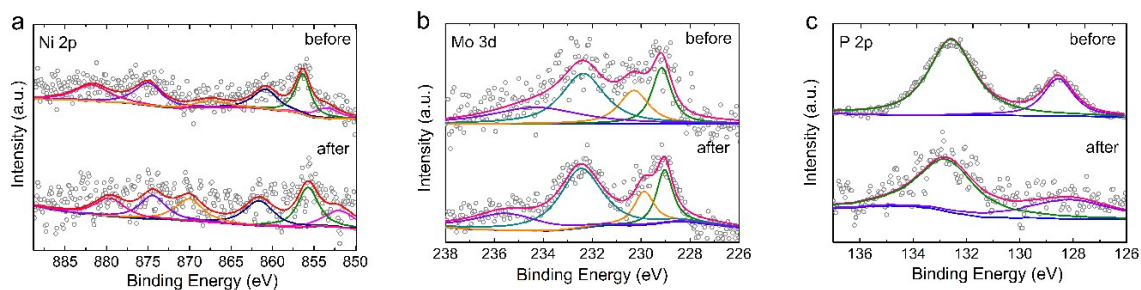

**Fig. S7** XPS of CN/3NiMoP<sub>2</sub> before and after cycling tests for H<sub>2</sub> production.

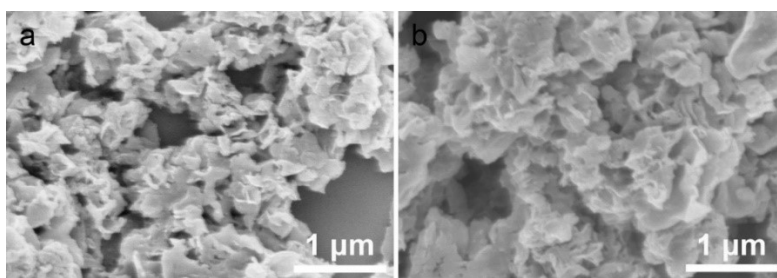

**Fig. S8** SEM of CN/3NiMoP<sub>2</sub> before and after cycling tests for H<sub>2</sub> production.

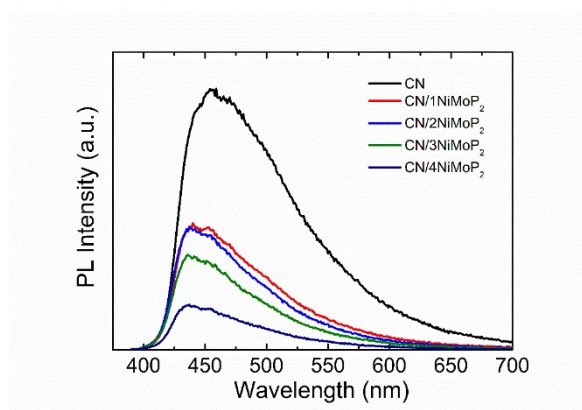

**Fig. S9** PL spectra of CN/xNiMoP<sub>2</sub>.

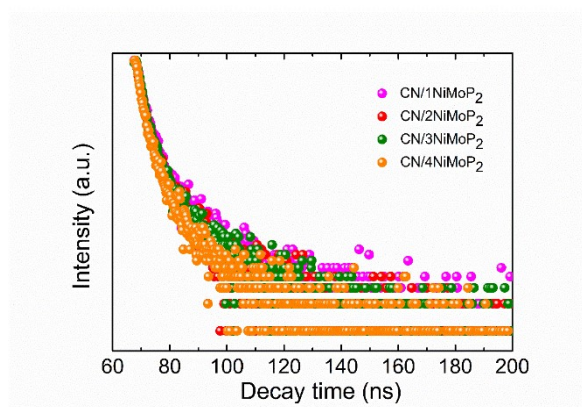

**Fig. S10** Time-resolved transient PL decay spectra of CN/xNiMoP<sub>2</sub>.



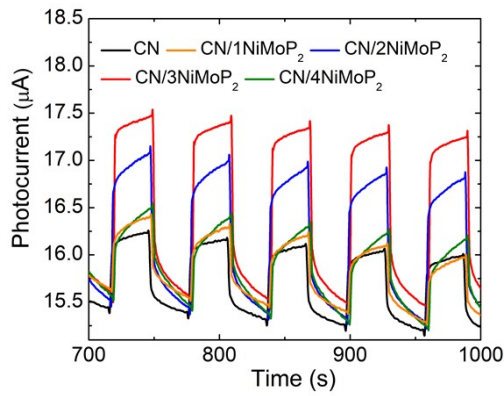

**Fig. S11** Transient photocurrent responses ( $i-t$  curves) of  $\text{CN}/x\text{NiMoP}_2$  under visible-light irradiation ( $>420$  nm).

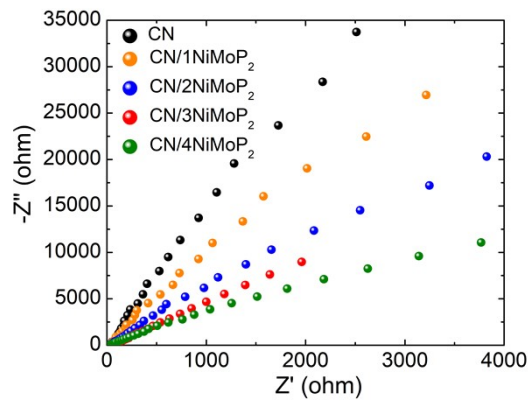

**Fig. S12** EIS spectra in the dark of  $\text{CN}/x\text{NiMoP}_2$ .

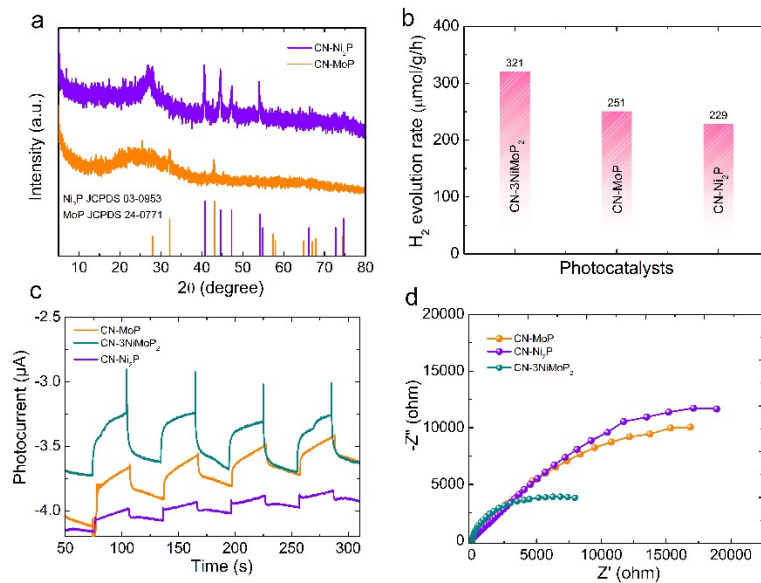

**Fig. S13** (a) XRD patterns of  $\text{CN-Ni}_2\text{P}$  and  $\text{CN-MoP}$ . (b) Photocatalytic  $\text{H}_2$  production



rates of different samples ( $\lambda > 420$  nm). (c) Transient photocurrent responses ( $i-t$  curves) under visible-light irradiation ( $>420$  nm). (d) EIS spectra in the dark.

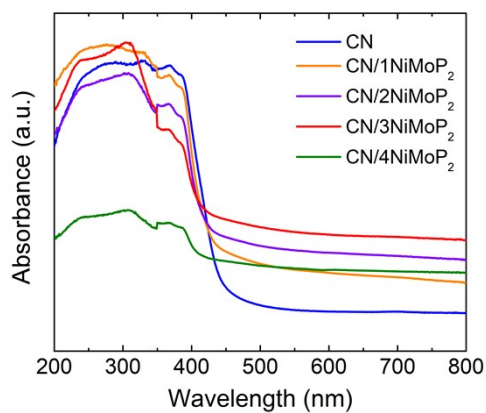

**Fig. S14** UV-vis diffuse reflectance spectra of CN/xNiMoP<sub>2</sub>.

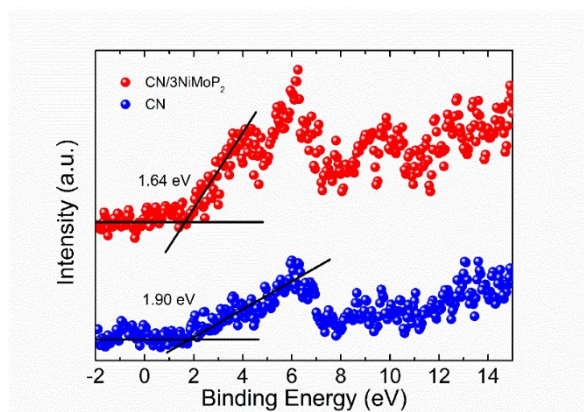

**Fig. S15** XPS valence band spectra of CN and CN/3NiMoP<sub>2</sub>.

**Table S2.** The comparison of photocatalytic performance with cocatalysts in this work with other CN based ones for photocatalytic H<sub>2</sub> evolution in recent literatures.

| Photocatalyst | Cocatalyst                     | Light source                                 | Reactant solution | Activity ( $\mu\text{mol h}^{-1} \text{g}^{-1}$ ) | AQE (%)       | Ref.      |
|---------------|--------------------------------|----------------------------------------------|-------------------|---------------------------------------------------|---------------|-----------|
| CN            | NiMoP <sub>2</sub>             | 300 W Xe lamp ( $\lambda > 420\text{nm}$ )   | TEOA              | 783                                               | 3.9 (420 nm)  | This work |
| CN            | PA-Ni                          | visible light ( $\lambda > 420 \text{ nm}$ ) | MeOH              | 713                                               | 2.8 (940 nm)  | 1         |
| mpg-CN        | FeMoS <sub>x</sub>             | 300 W Xe lamp ( $\lambda > 420\text{nm}$ )   | TEOA              | 551.42                                            | 4.0 (420 nm)  | 2         |
| CN            | Co <sub>3</sub> O <sub>4</sub> | visible light                                | TEOA              | 50                                                | None          | 3         |
| CN            | Cu(OH) <sub>2</sub>            | visible light                                | TEOA              | 187                                               | None          | 4         |
| CN            | CoO <sub>x</sub>               | 300 W Xe lamp ( $\lambda > 420\text{nm}$ )   | TEA               | 725.7                                             | 1.9 (420 nm)  | 5         |
| CN            | NCDS/MoS <sub>2</sub>          | 300 W Xe lamp ( $\lambda > 420 \text{ nm}$ ) | TEOA              | 212.41                                            | None          | 6         |
| CN            | Ni(OH) <sub>2</sub>            | 300 W Xe lamp ( $\lambda > 400 \text{ nm}$ ) | TEOA              | 87.2                                              | 8.2 (400 nm)  | 7         |
| CN            | Mo-Mo <sub>2</sub> C           | 300 W Xe lamp ( $\lambda > 420\text{nm}$ )   | TEOA              | 219.7                                             | 8.3 (420 nm)  | 8         |
| CN            | Ni <sub>2</sub> P/NiO          | 300 W Xe lamp ( $\lambda > 420\text{nm}$ )   | TEOA              | 504                                               | 0.22 (400nm)  | 9         |
| CN            | FeP                            | 300 W Xe lamp ( $\lambda > 420\text{nm}$ )   | TEOA              | 177.9                                             | 1.57 (420 nm) | 10        |

## References

1. Y. Huang, Y. Jian, L. Li, D. Li, Z. Fang, W. Dong, Y. Lu, B. Luo, R. Chen, Y. Yang, M. Chen and W. Shi, *Angew. Chem. Int. Ed.*, 2021, **60**, 5245.
2. B. Wang, C. Yan, G. Xu, X. Shu, J. Lv and Y. Wu, *Chem. Eng. J.*, 2022, **427**, 131507.
3. L. Yang, J. Liu, L. Yang, M. Zhang, H. Zhu, F. Wang and J. Yin, *Renew. Energy*, 2020, **145**, 691.
4. S. Mahzoon, M. Haghghi and S. M. Nowee, *Renew. Energy*, 2020, **150**, 91-100.
5. Y. X. Zhu, T. Wan, X. M. Wen, D. W. Chu and Y. J. Jiang, *Appl. Catal. B: Environ.*, 2019, **244**, 814.
6. Y. Jiao, Q. Huang, J. Wang, Z. He and Z. Li, *Appl. Catal. B: Environ.*, 2019, **247**, 124.
7. R. Cao, H. Yang, S. Zhang and X. Xu, *Appl. Catal. B: Environ.*, 2019, **258**, 117997.
8. J. Dong, Y. Shi, C. P. Huang, Q. Wu, T. Zeng and W. F. Yao, *Appl. Catal. B: Environ.*, 2019, **243**, 27.
9. J.-W. Shi, Y. Zou, L. Cheng, D. Ma, D. Sun, S. Mao, L. Sun, C. He and Z. Wang, *Chem. Eng. J.*, 2019, **378**, 122161.
10. D. Zeng, T. Zhou, W.-J. Ong, M. Wu, X. Duan, W. Xu, Y. Chen, Y.-A. Zhu and D.-L. Peng, *ACS Appl. Mater. Interfaces*, 2019, **11**, 5651.
